# Supplementary material
Source: PubMed Central journal article supplement (PMC9452482)
Supplement: NIHMS1829394-supplement-Supplemental_Material.pdf [file NIHMS1829394-supplement-Supplemental_Material.pdf]

# **An efficient cell-free protein synthesis platform for producing proteins with pyrrolysine-based non-canonical amino acids**

Arnaz Ranji Charna<sup>1,2</sup>, Benjamin J Des Soye<sup>1,2</sup>, Ioanni Ntai<sup>2</sup>, Neil L. Kelleher<sup>2,3,4</sup>, and Michael C Jewett<sup>1,2,4,5\*</sup>

<sup>1</sup>Department of Chemical and Biological Engineering, Northwestern University, 2145 Sheridan Road, Evanston, IL 60208, USA.

<sup>2</sup>Chemistry of Life Processes Institute, Northwestern University, 2170 Campus Drive, Evanston, IL 60208, USA

<sup>3</sup>Department of Chemistry, Northwestern University, Evanston, Illinois 60208, United States

<sup>4</sup>Center for Synthetic Biology, Northwestern University, Evanston, Illinois 60208, United States

<sup>5</sup>Member, Robert H. Lurie Comprehensive Cancer Center, Northwestern University, Feinberg School of Medicine, Northwestern University, 303 E. Superior, Chicago, IL 60611, USA

\* Corresponding author: [m-jewett@northwestern.edu](mailto:m-jewett@northwestern.edu)

Tel: (+1) 847 467 5007; Fax (+1) 847 491 3728

Running header: Cell-free protein synthesis of pyrrolysine based ncAAs

## **Supplementary Information**

Supplementary Figures 1-2  
Supplementary Tables 1-2  
Supplementary Methods  
Supplementary Sequences

## Supplementary Figures

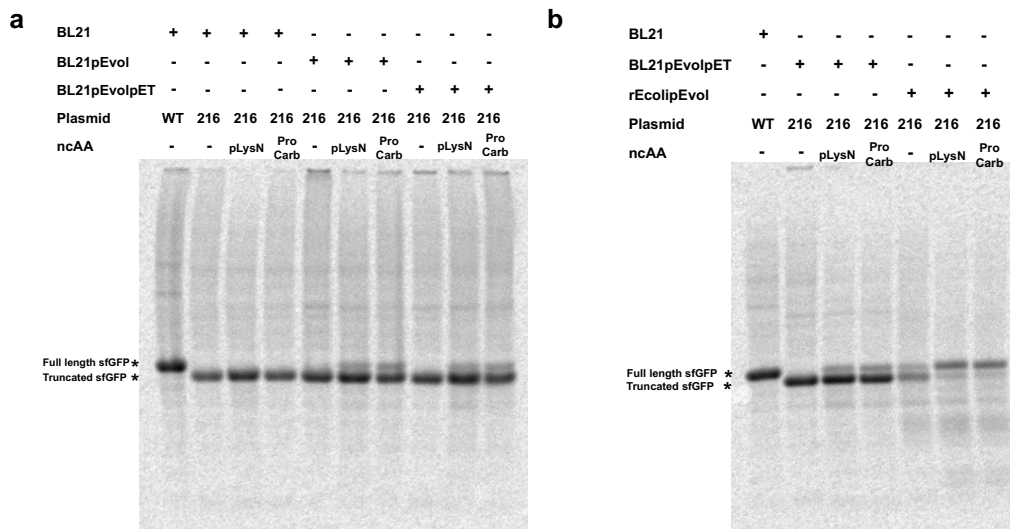

**Supplementary Figure 1: Proteins produced in rEcoli extract have less truncated product than proteins produced in BL21 derived lysates.** Autoradiogram of  $^{14}\text{C}$ -leucine labeled proteins in (a) BL21 based extracts and (b) BL21 versus rEcoli extracts. Full length and truncated sfGFP proteins are indicated. WT indicates wt-sfGFP plasmid was used; 216 indicates sfGFP-T216 plasmid was used. Gels representative of three independent experiments.

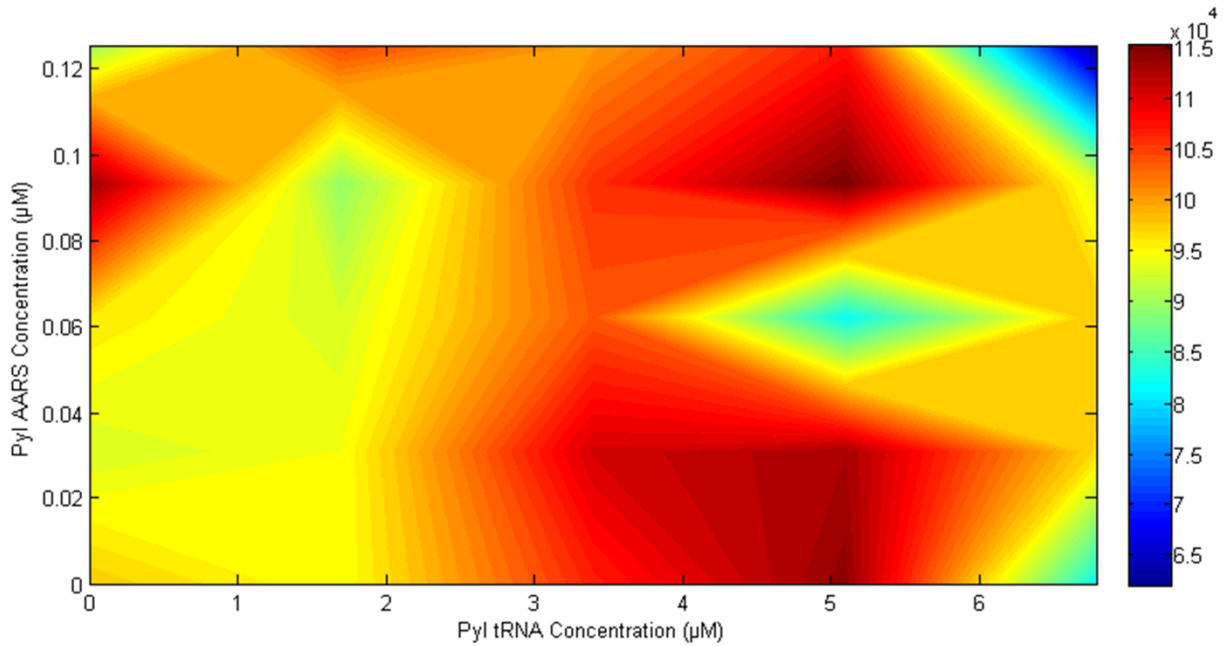

**Supplementary Figure 2: Addition of extra PyIRS or Pyl tRNA<sub>CUA</sub><sup>Pyl</sup> does not significantly improve the incorporation of ncAAs in rEcoli based extracts.** sfGFP yields (RFUs) of samples in rEcolipEvol extract are plotted using MatLab software with increasing PyIRS concentration on the y-axis and increasing tRNA<sub>CUA</sub>Pyl. Two independent reactions were performed for each data point.

## Supplementary Tables

Supplementary Table 1. Monoisotopic masses of the different proteins in this work.

| Figure | GFP species                           | mass (Da, Exper) | mass (Da, Theor) | error (ppm) | Shift from WT GFP (Da, Exper) | Shift from WT GFP (Da, Theor) |
|--------|---------------------------------------|------------------|------------------|-------------|-------------------------------|-------------------------------|
| 5a     | WT GFP*                               | 26847.52         | 26847.45         | 2.6         | --                            | --                            |
| 5a     | BI21pEvolpET extract: 1TAG + pLysN *  | 27010.63         | 27010.55         | 3.0         | 163.18                        | 163.10                        |
| 5a     | BI21pEvolpET extract: 1TAG + ProCarb* | 26956.57         | 26956.51         | 2.2         | 109.12                        | 109.05                        |
| 5a     | rEcolipEvol extract: 1TAG + pLysN     | 27141.7          | 27141.59         | 4.1         | 163.21                        | 163.10                        |
| 5a     | rEcolipEvol extract: 1TAG + ProCarb * | 26956.55         | 26956.51         | 1.5         | 109.10                        | 109.05                        |
| 5b     | WT GFP*                               | 26847.52         | 26847.45         | 2.6         | --                            | --                            |
| 5b     | rEcolipEvol extract: 2TAG + pLysN     | 27318.78         | 27318.71         | 2.6         | 340.29                        | 340.22                        |
| 5b     | rEcolipEvol extract: 3TAG + ProCarb   | 27306.71         | 27306.67         | 1.5         | 328.22                        | 328.18                        |

**Supplementary Table 2. Oligonucleotide sequences used in this work.**

| <b>Oligo name</b> | <b>Sequence</b>                                                                                                                                                                    |
|-------------------|------------------------------------------------------------------------------------------------------------------------------------------------------------------------------------|
| <b>AR109</b>      | gatatccatatggataaaaaaccactaaactctg                                                                                                                                                 |
| <b>AR108</b>      | ggtagcgcggccgccaggttgtagaaatcccg                                                                                                                                                   |
| <b>AR045</b>      | tggcggaaaccccgggaatc                                                                                                                                                               |
| <b>GB1</b>        | gcttttagatctaatacgactcactataggagaccggctgatgagtcggtgaggacgaaacggtaccggtacc<br>gtcggaaacctgatcatgtagatcgaatggactctaaatccgtcagccgggtagattccggggttccgccagga<br>agcttacatccgtcgaccaaagc |
| <b>T7500up</b>    | ccgaaggtaactggcttcagcagag                                                                                                                                                          |
| <b>S2-f</b>       | tagaaagggaagaactgtttac                                                                                                                                                             |
| <b>S2-r</b>       | catatgtatatctccttctaaagttaaac                                                                                                                                                      |

## Supplementary methods

### Synthesis of N<sup>6</sup>-(5-Norbornen-2-ylloxycarbonyl)-L-Lysine Hydrochloride

The synthesis of N<sup>6</sup>-((5-norbornen-2-yl)oxy)carbonyl-L-lysine (**1**) has previously been described<sup>i</sup>, however the modified route shown in Scheme 1 was employed to avoid the use of phosgene. Condensation of p-nitrophenyl chloroformate with 5-norbornen-2-ol (mixture of isomers) in the presence of pyridine gave 5-norborn-5-en-2-yl (4-nitrophenyl) carbonate (**2**) in 28-35% isolated yield. Commercial N<sup>2</sup>-Boc-L-lysine methyl ester hydrochloride was treated with **2** and triethylamine in DMF followed by sequential removal of the protecting groups to give compound **1** as the hydrochloride salt. Compound **1** is a ~ 3:1 mixture of the endo to exo isomers determined by <sup>1</sup>H NMR.

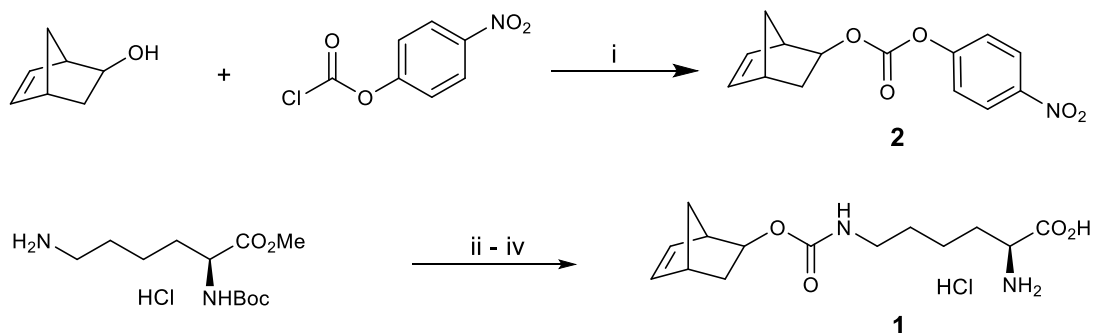

Scheme 1 - Reagents: i. pyridine/DCM, r.t.; ii. **2**, Et<sub>3</sub>N, DMF; iii. LiOH, MeOH/H<sub>2</sub>O; iv. 4M HCl/dioxane.

N<sup>2</sup>-Boc-L-lysine methyl ester hydrochloride was purchased from ChemImpex Chemical Company and was used as received. All other reagents were purchased from Aldrich Chemical Company and were used as received. NMR spectra were obtained on Bruker Avance III Ag500 spectrometer at 500 MHz (proton) and 125 MHz (carbon). LCMS spectra were obtained using a Waters Acquity-H Single Quad UPLC-MS system, eluting on a Waters BEH C-18 column (50 x 2.1 mm, 1.7 micron) using 5 – 95% acetonitrile in water modified with 0.1% formic acid @ 0.8 mL/min over 2 minutes with a 1-minute hold at 95% acetonitrile in water.

### **5-norbornen-2-yl (4-nitrophenyl) carbonate (2):**

A dry 100 mL flask was charged with 5-norbornen-2-ol (0.441 g, 4 mmol), 4-nitrophenyl chloroformate (1.048 g, 5.20 mmol) and DCM (Volume: 24 ml). The flask was placed under nitrogen, cooled to 0 °C and pyridine (0.404 ml, 5.00 mmol) was added. The reaction was stirred at 0°C for 2 hours then allowed to warm to room temperature and stirred overnight. The reaction was diluted with DCM (30 mL) and washed with brine (3 x 50 mL). The organic phase was separated, dried over sodium sulfate, filtered and concentrated under vacuum. The residue was purified by flash column chromatography (Biotage Isolera, 50 g silica column, eluting with 0-100% DCM in hexanes over 10 CV @ 40 mL/min) to give a white solid determined by <sup>1</sup>H NMR to be the product in a ~ 3:1 mixture of endo to exo isomers. <sup>1</sup>H NMR (500 MHz, CHLOROFORM-d) δ 8.25 – 8.32 (m, 2H), 7.35 – 7.43 (m, 2H), 6.44 (dd, *J* = 2.99, 5.52 Hz, 0.7H), 6.32\* (dd, *J* = 2.84, 5.67 Hz, 0.2H), 6.07 (dd, *J* = 2.84, 5.67 Hz, 0.7H), 6.01\* (dd, *J* = 3.31, 5.52 Hz, 0.2H), 5.38 (td, *J* = 3.27, 7.96 Hz, 0.7H), 4.75\* (d, *J* = 6.94 Hz, 0.2H), 3.29 (br. S., 0.7H), 3.09\* (br. S., 0.2H), 2.94 (br. S., 1H), 2.25 (ddd, *J* = 3.63, 8.43, 12.53 Hz, 0.7H), 1.83\* (ddd, *J* = 2.52, 6.94, 12.93 Hz, 0.2H), 1.73 – 1.78\* (m, 0.2H), 1.67 – 1.72\* (m, 0.2H), 1.53 – 1.65 (m, 1.1H), 1.39 (d, *J* = 8.83 Hz, 0.7H), 1.14 (td, *J* = 3.15, 12.93 Hz, 0.7H) \* indicates exo isomer.

### **N<sup>2</sup>-t-butoxycarbonyl-N<sup>6</sup>-((5-norbornen-2-yl)oxy)carbonyl-L-lysine methyl ester:**

A solution of N<sup>2</sup>-Boc-L-Lysine methyl ester hydrochloride (0.757 g, 2.55 mmol) and 5-norbornen-2-yl (4-nitrophenyl) carbonate (0.772 g, 2.81 mmol) in dry DMF (Volume: 15 ml) was treated with triethylamine (1.066 ml, 7.65 mmol) and allowed to stir overnight at room temperature. The reaction was diluted with DCM (30 mL) and washed with water (5 x 25 mL). The organic phase was dried over sodium sulfate and filtered. The reaction was concentrated under vacuum and the residue taken up in DCM (3 mL). ~ 0.2 mL was loaded onto a 1g Biotage samplet and purified by

flash chromatography (10 g KP-Sil column, 0-100 DCM in hexanes over 10 CV @ 12 mL/min followed by 0-10% methanol in DCM over 5 CV @ 12 mL/min) to give the product as a white waxy solid. With the column conditions determined, the remaining material was purified (Biotage Isolera, 25g KP-Sil column, 0-10% methanol in DCM over 10 CV @ 25 mL/min). The products from both columns were combined to give the product (0.6 g, 59%) as a waxy, white solid. <sup>1</sup>H NMR showed a ~ 3:1 mixture of isomers, endo to exo based on the starting carbonate. The product was slightly contaminated with DMF but was used as is in the next step. <sup>1</sup>H NMR (500 MHz, CHLOROFORM-d) δ 6.34 (dd, *J* = 2.84, 5.36 Hz, 0.7H), 6.24\* (d, *J* = 2.52 Hz, 0.2H), 5.95 – 6.02 (m, 1H), 5.26 (d, *J* = 4.10 Hz, 0.7H), 5.11 (br. S., 0.7H), 4.64 (br. S., 1H), 4.30 (d, *J* = 4.73 Hz, 1H), 3.76 (s, 3H), 3.15 (br. S., 3H), 2.84 (br. S., 1H), 2.14 (ddd, *J* = 3.63, 8.35, 12.30 Hz, 0.7H), 1.80 (d, *J* = 5.36 Hz, 2H), 1.61 – 1.73 (m, 2H), 1.29 – 1.59 (m, 18H), 0.93 (d, *J* = 12.30 Hz, 0.7H) \* indicates exo isomer. LCMS (ESI+) *m/z* calculated: 396; found: 397 (M+H), *T<sub>r</sub>* = 2.16 min.

**N<sup>2</sup>-t-butoxycarbonyl-N<sup>6</sup>-((5-norbornen-2-yl)oxy)carbonyl-L-lysine:**

A solution of N<sup>2</sup>-t-butoxycarbonyl-N<sup>6</sup>-((5-norbornen-2-yl)oxy)carbonyl-L-lysine methyl ester (0.60 g, 1.513 mmol) in methanol (8.07 ml) was treated with lithium hydroxide monohydrate (0.140 g, 3.33 mmol) in water (2.018 ml). The resulting mixture was stirred at room temperature for 2 hours then concentrated under vacuum to a volume of ~ 3 mL. Water (3 mL) was added and the resulting solution washed with methylene chloride (3 x 5 mL). The aqueous phase was acidified to ~ pH 4 with 1N HCl and extracted with ethyl ether (5 x 5 mL). The combined organic phases were dried over sodium sulfate, filtered and concentrated under vacuum to give the product (0.43 g, 74%) as a white solid. <sup>1</sup>H NMR (500 MHz, CHLOROFORM-d) δ 6.35 (d, *J* = 1.89 Hz, 0.7H), 6.25\* (br. s., 0.2H), 5.99 (d, *J* = 2.52 Hz, 1H), 5.27 (d, *J* = 7.88 Hz, 1.3H), 4.57 - 4.83 (m, 1H), 4.13 - 4.41 (m, 1H), 3.16 (m, 3H), 2.85 (br. s., 1H), 2.15 (ddd, *J* = 3.63, 8.35, 12.30 Hz, 0.7H), 1.67 - 1.98 (m,



3H), 1.37 - 1.61 (m, 14H), 0.94 (d,  $J = 12.61$  Hz, 0.7H) \* exo isomer. LCMS (ESI+)  $m/z$  calculated: 382; found: 393 (M+H),  $T_r = 2.14$  min.

**N<sup>6</sup>-((5-norbornen-2-yl)oxy)carbonyl-L-lysine (1):**

A solution of N<sup>2</sup>-butoxycarbonyl-N<sup>6</sup>-((5-norbornen-2-yl)oxy)carbonyl-L-lysine (0.425 g, 1.089 mmol) in DCM (4 mL) was treated with hydrogen chloride, 4.0M in dioxane (0.408 mL, 1.634 mmol) and stirred at room temperature for 1 hr. A white precipitate formed. LCMS showed ~ 50% conversion so additional hydrogen chloride, 4.0M in dioxane (0.408 ml, 1.634 mmol) was added. The reaction was stirred for 30 minutes at which point it was nearly complete by LCMS. The solvents were removed under vacuum and the white solid allowed to stand overnight to complete the reaction. Residual solvent and trace HCl were removed under high vacuum for 1 hour. Compound **1** was isolated as a white solid (0.35 g, 100%). <sup>1</sup>H NMR (500 MHz, DMSO-d<sub>6</sub>)  $\delta$  7.11\* (t,  $J = 4.89$  Hz, 0.2H), 6.92 - 7.02 (m, 0.7H), 6.29 - 6.37\* (m, 0.2H), 6.27 (d,  $J = 2.84$  Hz, 0.7H), 6.01\* (dd,  $J = 3.15, 5.04$  Hz, 0.2H), 5.94 (d,  $J = 2.21$  Hz, 0.7H), 5.06 - 5.16 (m, 0.7H), 4.44 (d,  $J = 6.31$  Hz, 0.2H), 3.82 (br. s., 1H), 3.05 (br. s., 0.7H), 2.92 (d,  $J = 5.36$  Hz, 2H), 2.73 - 2.85 (m, 1.2H), 2.05 (ddd,  $J = 3.47, 8.28, 11.90$  Hz, 0.7H), 1.76 (br. s., 2H), 1.19 - 1.64 (m, 6H), 0.80 (d,  $J = 12.30$  Hz, 0.7H) <sup>13</sup>C NMR (125 MHz, DMSO-d<sub>6</sub>)  $\delta$  171.1, 164.0\*, 156.3, 156.2\*, 140.9\*, 138.2, 132.8\*, 131.9, 74.1\*, 74.0, 51.9, 47.2, 47.0\*, 45.9\*, 45.6, 41.7, 34.2\*, 34.1, 29.7, 28.9, 21.6. \* indicates exo isomer. LCMS (ESI+)  $m/z$  calculated: 282; found: 283 (M+H),  $T_r = 1.63$  min.

## Synthesis of N<sup>6</sup>-(propargyloxycarbonyl)-L-Lysine Hydrochloride

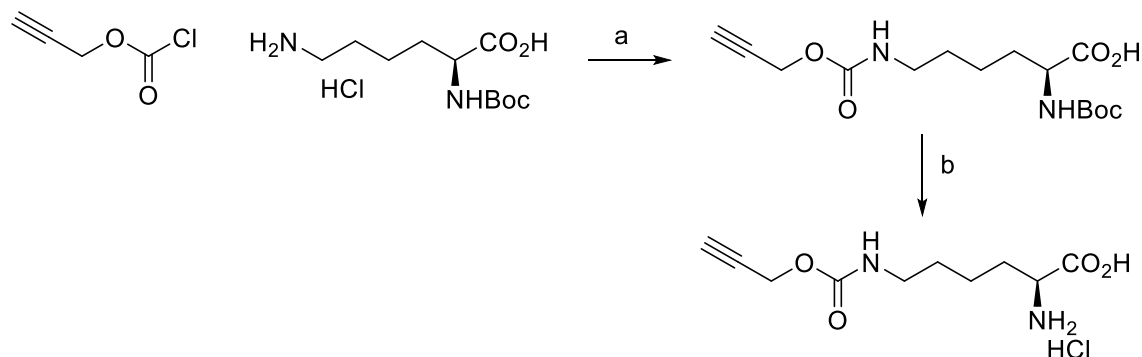

Conditions: a) THF, NaOH (aq), 0°C, b) 4M HCl (dioxane), CHCl<sub>3</sub>, 0°C

### **(S)-2-((tert-butoxycarbonyl)amino)-6-(((prop-2-yn-1-yloxy)carbonyl)amino)hexanoic acid.**

A solution of N<sup>2</sup>-Boc-L-lysine (1.232 g, 5 mmol) in THF (12.5 ml) and 1M sodium hydroxide (12.5 ml, 12.5 mmol) was cooled to 0 °C and treated with propargyl chloroformate (0.585 ml, 6.00 mmol) dropwise over 5 minutes. The resulting mixture was stirred at room temperature overnight. The reaction was cooled to 0°C and washed with ethyl ether (2 x 50 mL). The aqueous phase was acidified to ~ pH 4-5 with 1N HCl then extracted with ethyl acetate (3 x 50 mL). The combined extracts were dried over sodium sulfate, filtered and concentrated under vacuum to give the product as a colorless oil (1.42 g, 86%). <sup>1</sup>H NMR (500 MHz, CHLOROFORM-*d*) δ 6.23 (br. s., 1H), 5.23 (d, J = 6.62 Hz, 1H), 4.97 (br. s., 1H), 4.71 (d, J = 1.89 Hz, 2H), 4.25 - 4.40 (m, 1H), 4.14 (bs, 1H), 3.24 (d, J = 5.67 Hz, 2H), 2.50 (br. s., 1H), 1.67 - 1.95 (m, 2H), 1.52 - 1.63 (m, 2H), 1.48 (s, 9H); <sup>13</sup>C NMR (125 MHz, CDCl<sub>3</sub>) δ 155.99, 155.73, 80.46, 78.26, 74.68, 53.10, 52.53, 40.55, 31.64, 29.28, 28.34, 22.24, 14.23; LCMS (Method A) r.t. 1.21 min, *m/z* 329.5 (M+H).

**(S)-2-amino-6-(((prop-2-yn-1-yloxy)carbonyl)amino)hexanoic acid HCl.** A solution of (S)-2-((tert-butoxycarbonyl)amino)-6-(((prop-2-yn-1-yloxy)carbonyl)amino)hexanoic acid (1.420 g, 4.32 mmol) in chloroform (24 ml) was cooled to 0 °C. 4M hydrogen chloride (dioxane) (6.49 ml, 25.9

mmol) was added dropwise and the reaction allowed to warm to room temperature. After 1 hour LCMS showed no Boc cleavage. Additional HCl - dioxane (10 mL) was added and stirring continued for 3 days. The reaction was complete by LCMS. The volatiles were removed under vacuum and the resulting white powder dried for 2 hours @ 0.5 Torr. <sup>1</sup>H NMR (500 MHz, DEUTERIUM OXIDE) δ 4.53 (s, 2H), 3.87 (t, *J* = 6.31 Hz, 1H), 3.02 (t, *J* = 6.62 Hz, 2H), 2.75 (br. s., 1H), 1.72 - 1.92 (m, 2H), 1.39 - 1.48 (m, 2H), 1.22 - 1.38 (m, 2H); <sup>13</sup>C NMR (125 MHz, D<sub>2</sub>O) δ 172.67, 157.62, 100.00, 78.45, 75.44, 53.09, 52.29, 39.85, 29.39, 28.22, 21.32; LCMS (Method A) r.t. 0.84 min, *m/z* 229 (M+H).

## Supplementary Sequences

**pY71-GB1f (Transzyme Plasmid).** In green is the transzyme sequence. In blue is the Kan resistance sequence.

```
GGATCCTGCAGTTGAGATCCTTTTTTCTGCGCGTAATCTGCTGCTTGCAAACAAAAAACCACCGCT
ACCAGCGGTGGTTTGTGGCCGGATCAAGAGCTACCAACTCTTTTTCCGAAGGTAAGTGGCTTCAGC
AGAGCGCAGATACCAAATACTGTCTTCTAGTGTAGCCGTAGTTAGGCCACCACTTCAAGAACTCTG
TAGCACCGCCTACATACCTCGCTCTGCTAATCCTGTTACCAGTGGCTGCTGCCAGTGGCGATAAGTC
GTGTCTTACCGGGTTGGACTCAAGACGATAGTTACCGGATAAAGGCGCAGCGGTCTGGGCTGAACGG
GGGGTTCGTGCACACAGCCCAGCTTGGAGCGAACGACCTACACCGAACTGAGATACCTACAGCGTG
AGCATTGAGAAAGCGCCACGCTTCCCAGAGGGAGAAAGGCGGACAGGTATCCGGTAAGCGGCAGG
GTCGGAACAGGAGAGCGCACGAGGGAGCTTCCAGGGGGAAACGCCTGGTATCTTTATAGTCCTGTC
GGTTTTCGCCACCTCTGACTTGAGCGTCGATTTTTGTGATGCTCGTCAGGGGGCGGAGCCTATGG
AAACGAATTCAGATCTTAATACGACTCACTATAGGGAGACCGGCTGATGAGTCCGTGAGGACGAAAC
GGTACCCGGTACCGTCCGAAACCTGATCATGTAGATCGAATGGACTCTAAATCCGTTACGCCGGGT
AGATTCGCCGGGTTCGCCAGGAAGCTTACATCCGTCGACCGGCTGCTAACAAAGCCCGAAAGGA
AGCTGAGTTGGCTGCTGCCACCGCTGAGCAATAACTAGCATAACCCCTTGGGGCCTCTAAACGGGT
CTTGAGGGGTTTTTGTGAAAGCCAATTCTGATTAAGAAAACTCATCGAGCATCAAATGAAACTGCA
ATTTATTCATATCAGGATTATCAATACCATATTTTTGAAAAAGCCGTTTCTGTAATGAAGGAGAAAAC
CACCGAGGCAGTTCATAGGATGGCAAGATCCTGGTATCGGTCTGCGATTCCGACTCGTCCAACAT
CAATACAACCTATTAATTTCCCCTCGTCAAAAATAAGGTTATCAAGTGAGAAATCACCATGAGTGACG
ACTGAATCCGGTGAGAATGGCAAAGCTTATGCATTTCTTCCAGACTTGTTCAACAGGCCAGCCATT
ACGCTCGTCATCAAAATCACTCGCATCAACCAACCGTTATTCATTCGTGATTGCGCCTGAGCGAGA
CGAAATACGCGATCGCTGTTAAAAGGACAATTACAAACAGGAATCGAATGCAACCGGCGCAGGAACA
CTGCCAGCGCATCAACAATATTTTACCTGAATCAGGATATTCTTCTAATACCTGGAATGCTGTTTTC
CCGGGGATCGCAGTGGTGAGTAACCATGCATCATCAGGAGTACGGATAAAATGCTTGATGGTCGGA
AGAGGCATAAATCCGTGAGCCAGTTTGTGACCATCTCATCTGTAACATCATTGGCAACGCTACC
TTTGCCATGTTTCCAGAAACAACCTCTGGCGCATCGGGCTTCCCATAAATCGATAGATTGTGCGACCT
GATTGCCCGACATTATCGCGAGCCATTTATACCCATATAAATCAGCATCCATGTTGGAATTTAATCG
CGGCTTCGAGCAAGACGTTTCCCGTTGAATATGGCTCATAACACCCCTTGTATTACTGTTTTATGTAAG
```

CAGACAGTTTTATTGTTTCATGATGATATATTTTTATCTTGTGCAATGTAACATCAGAGATTTTGAGACA  
CAACGT

**pEVOL-Pyl.** In green is Pyl aaRS.

ATGGATAAAAAACCACTAAACACTCTGATATCTGCAACCGGGCTCTGGATGTCCAGGACCG  
GAACAATTCATAAAATAAACACCACGAAGTCTCTCGAAGCAAATCTATATTGAAATGGCA  
TGCGGAGACCACCTTGTGTAACAACCTCCAGGAGCAGCAGGACTGCAAGAGCGCTCAGG  
CACCACAAATACAGGAAGACCTGCAAACGCTGCAGGGTTTCGGATGAGGATCTCAATAAGT  
TCCTCACAAAGGCAAACGAAGACCAGACAAGCGTAAAAGTCAAGGTCGTTTCTGCCCTAC  
CAGAACGAAAAAGGCAATGCCAAAATCCGTTGCGAGAGCCCCGAAACCTCTTGAGAATAC  
AGAAGCGGCACAGGCTCAACCTTCTGGATCTAAATTTTACCTGCGATACCGGTTTCCACC  
CAAGAGTCAGTTTCTGTCCCGGCATCTGTTTCAACATCAATATCAAGCATTCTACAGGAGC  
AACTGCATCCGCACTGGTAAAAGGGAATACGAACCCCATACATCCATGTCTGCCCTGTT  
CAGGCAAGTGCCCCGCACTTACGAAGAGCCAGACTGACAGGCTTGAAGTCCTGTTAAAC  
CCAAAAGATGAGATTTCCCTGAATTCGGCAAGCCTTTCAGGGAGCTTGAGTCCGAATTGC  
TCTCTCGCAGAAAAAAGACCTGCAGCAGATCTACGCGGAAGAAAGGGAGAATTATCTGG  
GGAACTCGAGCGTGAATACCAGGTTCTTTGTGGACAGGGGTTTCTGGAAATAAAATC  
CCCGATCCTGATCCCTCTTGAGTATATCGAAAGGATGGGCATTGATAATGATACCGAACTT  
TCAAACAGATCTTCAGGGTTGACAAGAACTTCTGCCTGAGACCCATGCTTGCTCCAAACC  
TTTACAACCTACCTGCGCAAGCTTGACAGGGCCCTGCCTGATCCAATAAAAAATTTTGAATA  
GGCCCATGCTACAGAAAAGAGTCCGACGGCAAAGAACACCTCGAAGAGTTTACCATGCTG  
AACTTCTGCCAGATGGGATCGGGATGCACACGGGAAAATCTTGAAAGCATAATTACGGACT  
TCCTGAACCACCTGGGAATTGATTTCAAGATCGTAGGCGATTCTGCATGGTCTATGGGGA  
TACCCTTGATGTAATGCACGGAGACCTGGAACCTTCTCTGCAGTAGTCGGACCCATACCG  
CTTGACCGGGAATGGGGTATTGATAAACCTGGATAGGGGCAGGTTTCGGGCTCGAACGC  
CTTCTAAAGGTTAAACACGACTTTAAAAATATCAAGAGAGCTGCAAGGTCCGAGTCTTACTA  
TAACGGGATTTCTACCAACCTGTAAAGTCGACCATCATCATCATCATTGAGTTTAAACGG  
TCTCCAGCTTGGCTGTTTTGGCGGATGAGAGAAGATTTTCAGCCTGATACAGATTAATCA  
GAACGCAGAAGCGGTCTGATAAAACAGAATTTGCCTGGCGGCAGTAGCGCGGTGGTCCCA  
CCTGACCCCATGCCGAACCTCAGAAGTGAACGCCGTAGCGCCGATGGTAGTGTGGGGTCT  
CCCCATGCGAGAGTAGGGAACCTGCCAGGCATCAAATAAACGAAAGGCTCAGTCGAAAGA  
CTGGGCCTTGTGTGAGCTCCCGGTCATCAATCATCCCATAATCCTTGTTAGATTATCAA  
TTTTAAAAAATAACAGTTGTGAGCCTGTCCCGCTTAAATATCATACGCCGTTATACGTTGTT  
TACGCTTTGAGGAATCCCATATGGATAAAAAACCACTAAACACTCTGATATCTGCAACCGG  
GCTCTGGATGTCCAGGACCGGAACAATTCATAAAATAAACACCACGAAGTCTCTCGAAGC  
AAAATCTATATTGAAATGGCATGCGGAGACCACCTTGTGTAACAACCTCCAGGAGCAGCA  
GACTGCAAGAGCGCTCAGGCACCACAAATACAGGAAGACCTGCAAACGCTGCAGGGTTT  
CGGATGAGGATCTCAATAAGTTCCTCACAAAGGCAAACGAAGACCAGACAAGCGTAAAAGT  
CAAGGTCGTTTCTGCCCTACCAGAACGAAAAAGGCAATGCCAAAATCCGTTGCGAGAGC  
CCCGAAACCTCTTGAGAATACAGAAGCGGCACAGGCTCAACCTTCTGGATCTAAATTTTCA  
CCTGCGATACCGGTTTCCACCCAAGAGTCAGTTTCTGTCCCGGCATCTGTTTCAACATCAA  
TATCAAGCATTCTACAGGAGCAACTGCATCCGCACTGGTAAAAGGGAATACGAACCCCAT  
TACATCCATGTCTGCCCTGTTTCAGGCAAGTGCCCCGCACTTACGAAGAGCCAGACTGA  
CAGGCTTGAAGTCCTGTTAAACCCAAAAGATGAGATTTCCCTGAATTCGGCAAGCCTTTC  
AGGGAGCTTGAGTCCGAATTGCTCTCTCGCAGAAAAAAGACCTGCAGCAGATCTACGCG  
GAAGAAAGGGAGAATTATCTGGGGAACTCGAGCGTGAATACCAGGTTCTTTGTGGACA  
GGGGTTTTCTGGAAATAAAATCCCGATCCTGATCCCTCTTGAGTATATCGAAAGGATGGG  
CATTGATAATGATACCGAACTTTCAAACAGATCTTCAGGGTTGACAAGAACTTCTGCCTGA

GACCCATGCTTGCTCCAAACCTTTACAACCTGCGCAAGCTTGACAGGGCCCTGCCTGA  
TCCAATAAAAAATTTTTGAAATAGGCCCATGCTACAGAAAAGAGTCCGACGGCAAAGAACAC  
CTCGAAGAGTTTACCATGCTGAACTTCTGCCAGATGGGATCGGGATGCACACGGGAAAAT  
CTTGAAAGCATAATTACGGACTTCTGAACCACCTGGGAATTGATTTCAAGATCGTAGGCG  
ATTCTGCATGGTCTATGGGGATACCCTTGATGTAATGCACGGAGACCTGGAACCTTCTCT  
TGCAGTAGTCGGACCCATACCGCTTGACCGGGAATGGGGTATTGATAAACCTGGATAGG  
GGCAGGTTTCGGGCTCGAACGCCTTCTAAAGGTTAAACACGACTTTAAAAATATCAAGAGA  
GCTGCAAGGTCCGAGTCTTACTATAACGGGATTTCTACCAACCTGTAACTGCAGTTTCAA  
CGCTAAATTGCCTGATGCGCTACGCTTATCAGGCCTACATGATCTCTGCAATATATTGAGTT  
TGCGTGCTTTTGTAGGCCGGATAAGGCGTTCACGCCGCATCCGGCAAAGAAACAGCAAACA  
ATCCAAAACGCCGCGTTCAGCGGCGTTTTTCTGCTTTTCTTCGCGAATTAATTCGGCTTCG  
CAACATGTGAGCACCGGTTTATTGACTACCGGAAGCAGTGTGACCGTGTGCTTCTCAAATG  
CCTGAGGCCAGTTTGTCTCAGGCTCTCCCCGTGGAGGTAATAATTGACGATATGATCAGTGC  
ACGGCTAACTAAGCGGCCTGCTGACTTTCTCGCCGATCAAAGGCATTTTGTATTAAGGG  
ATTGACGAGGGCGTATCTGCGCAGTAAGATGCGCCCCGCATTGGAAACCTGATCATGTAG  
ATCGAATGGACTCTAAATCCGTTTACGCCGGGTTAGATTCCCGGGGTTTCCGCCAAATTCGA  
AAAGCCTGCTCAACGAGCAGGCTTTTTTGCATGCTCGAGCAGCTCAGGGTCAATTTGCTT  
TCGAATTTCTGCCATTCATCCGCTTATTATCACTTATTCAGGCGTAGCAACCAGGCGTTTAA  
GGGCACCAATAACTGCCTTAAAAAAATTACGCCCCGCCCTGCCACTCATCGCAGTACTGTT  
GTAATTCATTAAGCATTCTGCCGACATGGAAGCCATCACAAACGGCATGATGAACCTGAAT  
CGCCAGCGGCATCAGCACCTTGTGCGCTTGGTATAATATTTGCCCATGGTGAAAACGGG  
GGCGAAGAAGTTGTCCATATTGGCCACGTTTAAATCAAACCTGGTGAAACTCACCCAGGGA  
TTGGCTGAGACGAAAACATATTCTCAATAAACCTTTAGGGAAATAGGCCAGGTTTTTACC  
GTAACACGCCACATCTTGCGAATATATGTGTAGAAACTGCCGGAATCGTCGTGGTATTCA  
CTCCAGAGCGATGAAAACGTTTTCAGTTTGTCTCATGGAAAACGGTGTAAACAAGGGTGAACAC  
TATCCCATATCACAGCTCACCGTCTTTTATTGCCATACGGAATTCGGATGAGCATTTCATC  
AGGCGGGCAAGAATGTGAATAAAGGCCGGATAAACTTGTGCTTATTTTTCTTTACGGTCTT  
TAAAAAGGCCGTAATATCCAGCTGAACGGTCTGGTTATAGGTACATTGAGCAACTGACTGA  
AATGCCTCAAAATGTTCTTTACGATGCCATTGGGATATATCAACGGTGGTATATCCAGTGAT  
TTTTTTCTCCATTTTAGCTTCTTAGCTCCTGAAAATCTCGATAACTCAAAAAATACGCCCGG  
TAGTGATCTTATTTTATTATGGTGAAAGTTGGAACCTTTACGTGCCGATCAACGTCTCATT  
TTCGCCAAAAGTTGGCCCAGGGCTTCCCGGTATCAACAGGGACACCAGGATTTATTTATTC  
TGCGAAGTGATCTTCCGTACAGGTATTTATTCGGCGCAAAGTGCGTCGGGTGATGCTGC  
CAACTTACTGATTTAGTGTATGATGGTGTTTTTGAGGTGCTCCAGTGGCTTCTGTTTCTATC  
AGCTGTCCCTCCTGTTTACGCTACTGACGGGGTGGTGCCTAACGGCAAAGCACCGCCGGA  
CATCAGCGCTAGCGGAGTGTATACTGGCTTACTATGTTGGCACTGATGAGGGTGTGAGTG  
AAGTGCTTCATGTGGCAGGAGAAAAAAGGCTGCACCGGTGCGTCAGCAGAATATGTGATA  
CAGGATATATTCCGCTTCTCGCTCACTGACTCGCTACGCTCGGTGCTTCGACTGCGGCG  
AGCGGAAATGGCTTACGAACGGGGCGGAGATTTCTGGAAGATGCCAGGAAGATACTTAA  
CAGGGAAGTGAGAGGGCCGCGGCAAAGCCGTTTTTCCATAGGCTCCGCCCCCTGACAA  
GCATCACGAAATCTGACGCTCAAATCAGTGGTGGCGAAACCCGACAGGACTATAAAGATAC  
CAGGCGTTTCCCCCTGGCGGCTCCCTCGTGCGCTCTCCTGTTCTTGCCTTTTCGGTTTACC  
GGTGTCAATTCGCTGTTATGGCCGCGTTTGTCTCATTCCACGCCTGACACTCAGTTCCGGG  
TAGGCAGTTCGCTCCAAGCTGGACTGTATGCACGAACCCCGTTTTCAGTCCGACCGCTGC  
GCCTTATCCGGTAACTATCGTCTTGAGTCCAACCCGAAAGACATGCAAAAGCACCACTGG  
CAGCAGCCACTGGTAATTGATTTAGAGGAGTTAGTCTTGAAGTCATGCGCCGGTTAAGGCT  
AACTGAAAGGACAAGTTTTGGTACTGCGCTCCTCCAAGCCAGTTACCTCGGTTCAAAGA  
GTTGGTAGCTCAGAGAACCTTCGAAAACCGCCCTGCAAGGCGGTTTTTTTCGTTTTCAGAG  
CAAGAGATTACGCGCAGACCAAACGATCTCAAGAAGATCATCTTATTAATCAGATAAAATA  
TTTTCTAGATTTTCAAGTCAATTTATCTCTTCAAATGTAGCACCTGAAGTCAGCCCATACGAT  
ATAAGTTGTAATTCTCATGTTTGACAGCTTATCATCGATAAGCTTGGTACCCAATTATGACAA

CTTGACGGCTACATCATTCACTTTTTCTTCACAACCGGCACGGAACCTCGCTCGGGCTGGCC  
CCGGTGCATTTTTAAATACCCGCGAGAAATAGAGTTGATCGTCAAACCAACATTGCGAC  
CGACGGTGGCGATAGGCATCCGGGTGGTGTCAAAGCAGCTTCGCCTGGCTGATACGTT  
GGTCCCTCGCGCCAGCTTAAGACGCTAATCCCTAACTGCTGGCGGAAAAGATGTGACAGAC  
GCGACGGCGACAAGCAAACATGCTGTGCGACGCTGGCGATATCAAATTGCTGTCTGCCA  
GGTGATCGCTGATGTAAGCAAGCCTCGCGTACCCGATTATCCATCGGTGGATGGAGCG  
ACTCGTTAATCGCTTCCATGCGCCGCGAGTAACAATTGCTCAAGCAGATTTATCGCCAGCAG  
CTCCGAATAGCGCCCTTCCCCTTGCCCGGCGTTAATGATTTGCCCAAACAGGTCGCTGAAA  
TGCGGCTGGTGCCTTCCATCCGGGCGAAAGAACCCTGATTGGCAAATATTGACGGCCAG  
TTAAGCCATTCATGCCAGTAGGCGCGCGGACGAAAGTAAACCCACTGGTGATACCATTG  
CGAGCCTCCGGATGACGACCGTAGTGATGAATCTCTCTGCGGGAACAGCAAAATATCA  
CTCGGTCCGCAAAACAAATTCTCGTCCCTGATTTTTACCACCCCTGACCGCGAATGGTGA  
GATTGAGAATATAACCTTTCATTCCCAGCGGTGCGTGCATAAAAAATCGAGATAACCGTT  
GGCCTCAATCGGCGTTAAACCCGCCACCAGATGGGCATTAACGAGTATCCCGGCAGCAG  
GGGATCATTTTGCCTTCAGCCATACTTTTCATACTCCCGCCATTCAGAGAAGAAACCAATT  
GTCCATATTGCATCAGACATTGCCGTCACTGCGTCTTTACTGGCTCTTCTCGCTAACCAAA  
CCGGTAACCCCGCTTATTAAGGCATTCTGTAACAAAGCGGGACCAAAGCCATGACAAAA  
CGCGTAACAAAAGTGTCTATAATCACGGCAGAAAAGTCCACATTGATTATTTGCACGGCGT  
CACACTTTGCTATGCCATAGCATTTTTATCCATAAGATTAGCGGATCCTACCTGACGCTTTT  
TATCGCAACTCTCTACTGTTTCTCCATACCCGTTTTTTTTGGGCTAACAGGAGGAATTAGATC  
T

**pY71-sfGFP-1xTAG.** In green is the amber codon.

TCTTTTTCGGCGATTTATACGACTCACTATAGGGAGACCACAACGGTTTTCCCTCTAGAAATAATTTTG  
TTAACTTTAAGAAGGAGATATACATATGagcAAAGGTGAAGAACTGTTTACCGGCGTTGTGCCGATT  
TGGTGGAACTGGATGGCGATGTGAACGGTCACAAATTCAGCGTGCCTGGTGAAGGTGAAGGCGATG  
CCACGATTGGCAAACCTGACGCTGAAATTTATCTGCACCACCGGCAAACCTGCCGGTGCCGTGGCCGA  
CGCTGGTGACCACCCTGACCTATGGCGTTTCAAGTGTGTTTAGTCGCTATCCGGATCACATGAAACGTCA  
CGATTTCTTTAAATCTGCAATGCCGGAAGGCTATGTGCAGGAACGTACGATTAGCTTTAAAGATGATG  
GCAAATATAAACGCGCGCCGTTGTGAAATTTGAAGGCGATACCCTGGTGAACCGCATTGAACTGAA  
AGGCACGGATTTTAAAGAAGATGGCAATATCCTGGGCCATAAACTGGAATACAACCTTTAATAGCCATA  
ATGTTTATATTACGGCGGATAAACAGAAAAATGGCATCAAAGCGAATTTTACCGTTCGCCATAACGTT  
GAAGATGGCAGTGTGCAGCTGGCAGATCATTATCAGCAGAATACCCCGATTGGTGTGATGGTCCGGTG  
CTGCTGCCGGATAATCATTATCTGAGCACGACGACCGTTCTGTCTAAAGATCCGaacGAAAAAGGC**TA**  
**G**CGGGACCACATGTTTCTGCACGAATATGTGAATGCGGCAGGTATTACGTGGAGCCATCCGCAGTT  
CGAAAAATAAGTCGACCGGCTGCTAACAAAGCCGAAAGGAAGCTGAGTTGGCTGCTGCCACCGCT  
GAGCAATAACTAGCATAACCCCTTGGGGCCTCTAAACGGGTCTTGAGGGGTTTTTTTGTGAAAGCC  
AATTCTGATTAGAAAACTCATCGAGCATCAAATGAACTGCAATTTATTCATATCAGGATTATCAATA  
CCATATTTTTTTGAAAAAGCCGTTTCTGTAATGAAGGAGAAAACTCACCGAGGCAGTTTCCATAGAT  
GGCAAGATCCTTGATATCGTCTGGCGATTCCGACTCGTTCCAAACATCATAACCTATTAGTTTCCC  
CTTCGTCAAATAACGTTTATCAAGTTGGATATCACATTGATGACGACTGGAATCGGGTGAGGTTGCC  
AAAGGCCTTTAAGGCT

**pY71-sfGFP-2xTAG.** In green are the amber codons.

TCTTTTTCGGCGATTTATACGACTCACTATAGGGAGACCACAACGGTTTTCCCTCTAGAAATAATTTTG  
TTAACTTTAAGAAGGAGATATACATATG**TAG**AAAGGTGAAGAACTGTTTACCGGCGTTGTGCCGATT

CTGGTGGAACTGGATGGCGATGTGAACGGTCACAAATTCAGCGTGCGTGGTGAAGGTGAAGGCGAT  
GCCACGATTGGCAAACCTGACGCTGAAATTTATCTGCACCACCGGCAAACCTGCCGGTGCCGTGGCCG  
ACGCTGGTGACCACCCTGACCTATGGCGTTTCAGTGTTTTAGTCGCTATCCGGATCACATGAAACGTC  
ACGATTTCTTTAAATCTGCAATGCCGGAAGGCTATGTGCAGGAACGTACGATTAGCTTTAAAGATGAT  
GGCAAATATAAAACGCGCGCCGTTGTGAAATTTGAAGGCGATACCCTGGTGAACCGCATTGAACTGA  
AAGGCACGGATTTTAAAGAAGATGGCAATATCCTGGGCCATAAACTGGAATACAACCTTAAATAGCCAT  
AATGTTTATATTACGGCGGATAAACAGAAAAATGGCATCAAAGCGAATTTTACCGTTCCGCATAACGT  
TGAAGATGGCAGTGTGCAGCTGGCAGATCATTATCAGCAGAATACCCCGATTGGTGTATGGTCCGGT  
GCTGCTGCCGGATAATCATTATCTGAGCACGCAGACCGTTCTGTCTAAAGATCCGaacGAAAAAGGC  
AGCGGGACCACATGGTTCTGCACGAATATGTGAATGCGGCAGGTATTACGTGGAGCCATCCGCAGT  
TCGAAAATAAGTCGACCGGCTGCTAACAAAGCCCGAAAGGAAGCTGAGTTGGCTGCTGCCACCGC  
TGAGCAATAACTAGCATAACCCCTTGGGGCCTCTAAACGGGTCTTGAGGGGTTTTTTTTGCTGAAAGC  
CAATTCTGATTAGAAAACTCATCGAGCATCAAATGAACTGCAATTTATTCATATCAGGATTATCAAT  
ACCATATTTTTTTGAAAAAGCCGTTTCTGTAATGAAGGAGAAAACTCACCGAGGCAGTTTCCATAGA  
TGCAAGATCCTTGATATCGTCTGGCGATTCCGACTCGTTCCAAACATCATACAACCTATTAGTTTCC  
CCTTCGTCAAATAACGTTTATCAAGTTGGATATCACATTGATGACGACTGGAATCGGGTGAGGTTGC  
CAAAGGCCTTTAAGGCT

**pY71-sfGFP-3xTAG.** In green are the amber codons.

TCTTTTTCGGCGATTTATACGACTCACTATAGGGAGACCACAACGGTTTCCCTCTAGAAATAATTTTG  
TTAACTTTAAGAAGGAGATATACATATGTAGAAAGGTGAAGAAGCTGTTTACCGGCGTTGTGCCGATT  
CTGGTGGAACTGGATGGCGATGTGAACGGTCACAAATTCAGCGTGCGTGGTGAAGGTGAAGGCGAT  
GCCACGATTGGCAAACCTGACGCTGAAATTTATCTGCACCACCGGCAAACCTGCCGGTGCCGTGGCCG  
ACGCTGGTGACCACCCTGACCTATGGCGTTTCAGTGTTTTAGTCGCTATCCGGATCACATGAAACGTC  
ACGATTTCTTTAAATCTGCAATGCCGGAAGGCTATGTGCAGGAACGTACGATTAGCTTTAAAGATGAT  
GGCAAATATAAAACGCGCGCCGTTGTGAAATTTGAAGGCGATACCCTGGTGAACCGCATTGAACTGA  
AAGGCACGGATTTTAAAGAAGATGGCAATATCCTGGGCCATAAACTGGAATACAACCTTAAATAGCCAT  
AATGTTTATATTACGGCGGATAAACAGAAAAATGGCATCAAAGCGAATTTTACCGTTCCGCATAACGT  
TGAAGATGGCAGTGTGCAGCTGGCAGATCATTATCAGCAGAATACCCCGATTGGTGTATGGTCCGGT  
GCTGCTGCCGGATAATCATTATCTGAGCACGCAGACCGTTCTGTCTAAAGATCCGTAGGAAAAAGGC  
TAGCGGGACCACATGGTTCTGCACGAATATGTGAATGCGGCAGGTATTACGTGGAGCCATCCGCAG  
TTCGAAAATAAGTCGACCGGCTGCTAACAAAGCCCGAAAGGAAGCTGAGTTGGCTGCTGCCACCG  
CTGAGCAATAACTAGCATAACCCCTTGGGGCCTCTAAACGGGTCTTGAGGGGTTTTTTTTGCTGAAAG  
CCAATTCTGATTAGAAAACTCATCGAGCATCAAATGAACTGCAATTTATTCATATCAGGATTATCAA  
TACCATATTTTTTTGAAAAAGCCGTTTCTGTAATGAAGGAGAAAACTCACCGAGGCAGTTTCCATAG  
ATGGCAAGATCCTTGATATCGTCTGGCGATTCCGACTCGTTCCAAACATCATACAACCTATTAGTTTC  
CCCTTCGTCAAATAACGTTTATCAAGTTGGATATCACATTGATGACGACTGGAATCGGGTGAGGTTG  
CAAAGGCCTTTAAGGCT
